# Supplementary material
Source: PubMed Central journal article supplement (PMC6839782)
Supplement: NIHMS1537381-supplement-1.pdf [file NIHMS1537381-supplement-1.pdf]

**Table S1.** Adverse clinical biomarkers

|                                                             | Lean<br>(n=26) | NWO<br>(n=43) | Overweight/<br>Obese<br>(n=110) | p-value |
|-------------------------------------------------------------|----------------|---------------|---------------------------------|---------|
| Plasma glucose >125 mg/dL                                   | 1 (4)          | -             | 3 (3)                           | 0.47    |
| HDL cholesterol <50 mg/dL (females)<br>or <40 mg/dL (males) | 1 (4)          | 5 (12)        | 18 (17)*                        | 0.16    |
| Triglycerides >150 mg/dL                                    | -              | 5 (12)        | 25 (23)                         | 0.006   |
| Systolic Blood Pressure >140 mmHg                           | 3 (12)         | 3 (7)         | 17 (15)                         | 0.33    |
| Diastolic Blood Pressure >90 mmHg                           | 2 (8)          | -             | 18 (16)                         | 0.004   |

All data is presented as n (%).

- indicates no subjects had adverse biomarkers

\* 109 subjects

**Table S2.** Significantly enriched pathways and putative annotation of metabolic features within each pathway produced from *Mummichog* analyses

| Significantly Enriched Pathway                 | Individual Metabolites                                                                                                                                                                             | P-value |
|------------------------------------------------|----------------------------------------------------------------------------------------------------------------------------------------------------------------------------------------------------|---------|
| Linoleic metabolism                            | Linoleic acid, 13(S)-HODE, 13-OxoODE, 9,10-DHOME, 12(13)-EpOME, 9(S)-HPODE, 13(S)-HPODE                                                                                                            | 0.001   |
| Beta-alanine metabolism                        | Glutamate, Beta-alanine, Histidine, Ornithine, 5-oxoproline                                                                                                                                        | 0.002   |
| Histidine metabolism                           | Glutamate, Histidine, Beta-alanine, 5-oxoproline, Uric acid, Ornithine                                                                                                                             | 0.002   |
| Aspartate and asparagine metabolism            | Glutamate, 5-oxoproline, Proline, Putrescine, Carnitine, Ornithine, Lysine, Gamma-L-glutamyl cysteine, Acetamidopropanal, Acetylamino-butanal, 4-Guanidinobutanoate, Pyrroline-hydroxy-carboxylate | 0.002   |
| Glutathione metabolism                         | 5-oxoproline, Glutamate, Alanine, Gamma-L-glutamyl cysteine                                                                                                                                        | 0.002   |
| Glutamate metabolism                           | Glutamate, Alanine, Gamma-L-glutamyl cysteine, Pyruvate                                                                                                                                            | 0.003   |
| Lysine metabolism                              | Glutamate, Carnitine, Lysine, Pipecolinic acid, 2-oxoadipate, Unknown                                                                                                                              | 0.003   |
| Glycine, serine, alanine, threonine metabolism | Glutamate, Choline, Betaine, Pyruvate, Glycerate, Allotheronine, Alanine, Ornithine, Threonine                                                                                                     | 0.009   |
| Aminosugars metabolism                         | Glutamate, Inosine diphosphate, Glucosamine-6-phosphate, Pyruvate, CMP-N-glycolyneuraminate                                                                                                        | 0.02    |
| Urea cycle/amino group metabolism              | Glutamate, Proline, Ornithine, Thiopurine, N-acetyl-glutamate, Sarcosine, N4-Acetylamino-butanal                                                                                                   | 0.03    |

Metabolic feature annotation is based on output from *Mummichog* analyses. *Mummichog* utilizes the collective power of mapping statistically significant metabolic features to biological pathways to detect the most likely match for metabolites. Importantly, one mass to charge ratio ( $m/z$ ) may match to several metabolites. *Mummichog* maps all possible identifications for an  $m/z$  and then bases the final output on what pathway is enriched in a significant manner. The possible matches outside of the enriched pathway are distributed at random, eliminating the possibility of additional pathways.
